# Supplementary material for: Rapid microfluidic flow hydrogenation for reduction or deprotection of 18F-labeled compounds
Source: Royal Society of Chemistry journal article supplement (doi:10.1039/c3cc45166f), 2013-01-01
Supplement: c3cc45166f.pdf [file c3cc45166f.pdf]

# Rapid Microfluidic Flow Hydrogenation for Reduction or Deprotection of $^{18}\text{F}$ -Labeled Compounds

Steven H. Liang,<sup>a,b</sup> Thomas Lee Collier,<sup>a,c</sup> Benjamin H. Rotstein,<sup>a,b</sup> Rebecca Lewis,<sup>a,d</sup> Mia Steck,<sup>b</sup> and Neil Vasdev<sup>\*a,b</sup>

<sup>a</sup>Department of Radiology, Harvard Medical School, 55 Fruit Street, Boston, MA, USA, 02114. Tel: 617-643-4736; Fax: 617-726-6165; E-mail: vasdev.neil@mgh.harvard.edu

<sup>b</sup>Division of Nuclear Medicine and Molecular Imaging, Massachusetts General Hospital, 55 Fruit Street, Boston, MA, USA, 02114;

<sup>c</sup>Advion Inc., 10 Brown Road, Ithaca, NY, USA, 14850

<sup>d</sup>Department of Chemistry and Chemical Biology, Northeastern University, Boston, MA, USA, 02115

## Supporting Information

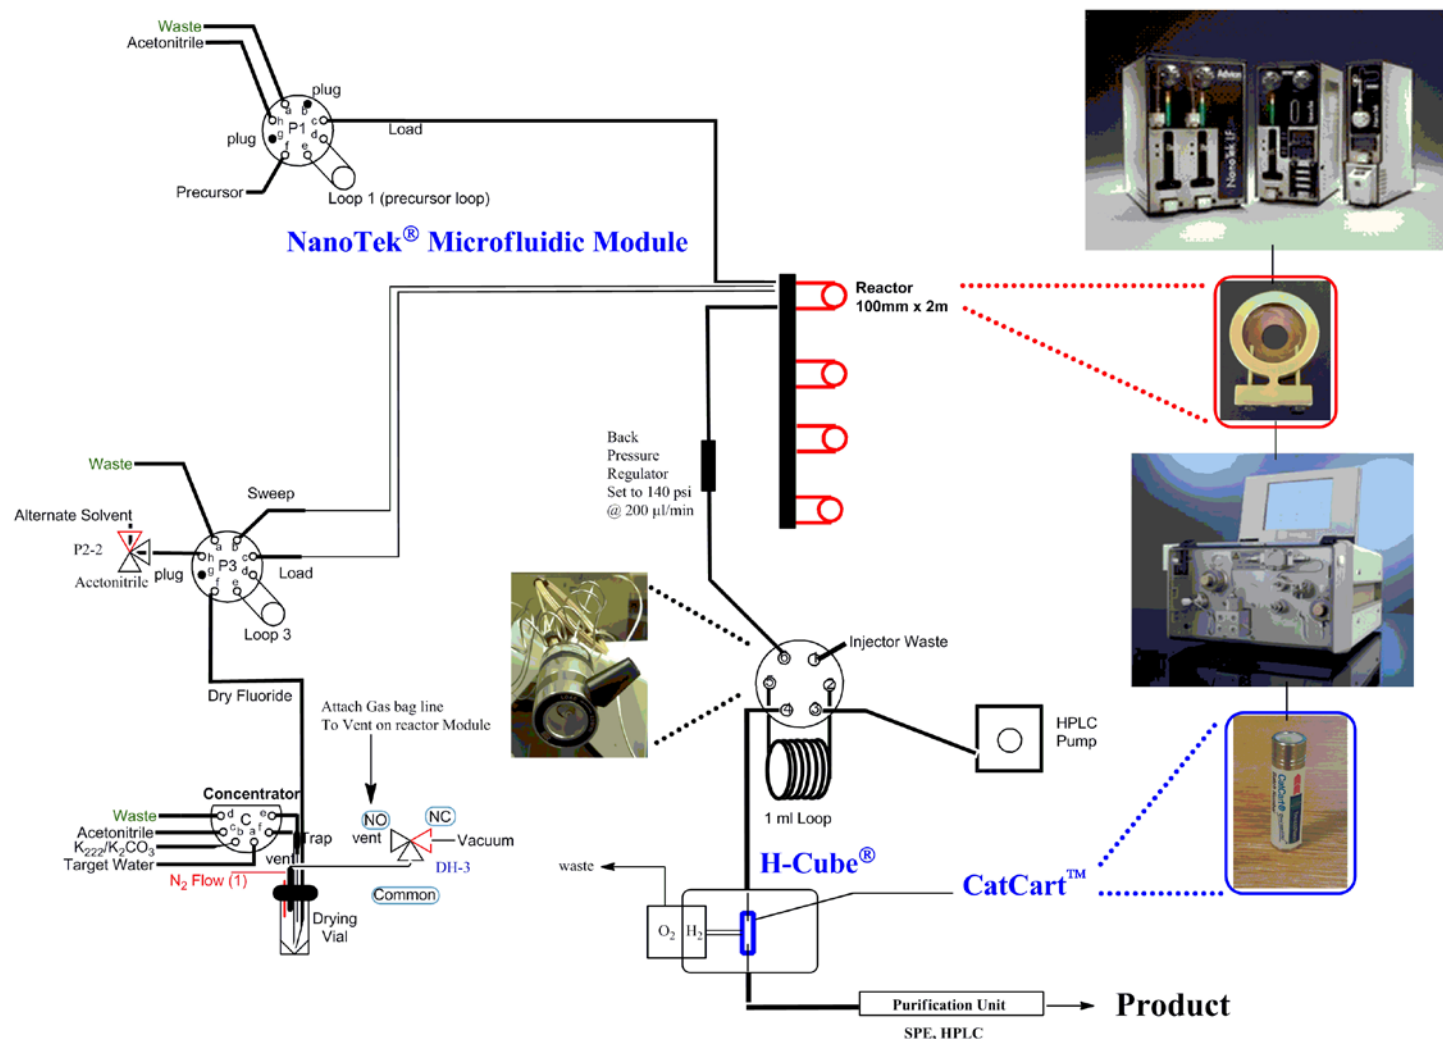

Plumbing diagram for integration of Nanotek to H-Cube to GE Tracerlab in series
